# Supplementary material
Source: HighWire-hosted journal article supplement (http://cmajopen.ca/highwire/filestream/81312/field_highwire_adjunct_files/0/2019-0186-1-at.pdf)
Supplement: 2019-0186-1-at.pdf [file 2019-0186-1-at.pdf]

Appendix 1 (as supplied by the authors): Supplemental tables

Supplemental Table S1. Population demographics of Indigenous air access only communities in Northern Ontario by year, sex, and age group

|        | 2012        | 2013        | 2014        | 2015        | 2016        | Mean    |
|--------|-------------|-------------|-------------|-------------|-------------|---------|
| Total  | 21488       | 21957       | 22414       | 22829       | 23257       | 22389   |
| Male   |             |             |             |             |             |         |
| 0-4    | *1023(9.3%) | 1015(9.1%)  | 995(8.7%)   | 931(8%)     | 918(7.7%)   | 976.4   |
| 5-9    | 1276(11.6%) | 1302(11.6%) | 1345(11.8%) | 1394(12%)   | 1399(11.8%) | 1343.2  |
| 10-14  | 1227(11.2%) | 1246(11.1%) | 1274(11.1%) | 1299(11.2%) | 1335(11.3%) | 1276.2  |
| 15-19  | 1207(11%)   | 1203(10.7%) | 1200(10.5%) | 1199(10.3%) | 1198(10.1%) | 1201.4  |
| 20-24  | 1124(10.2%) | 1145(10.2%) | 1157(10.1%) | 1156(9.9%)  | 1187(10%)   | 1153.8  |
| 25-29  | 916(8.3%)   | 972(8.7%)   | 997(8.7%)   | 1052(9%)    | 1106(9.3%)  | 1008.6  |
| 30-34  | 766(7%)     | 778(6.9%)   | 823(7.2%)   | 848(7.3%)   | 871(7.3%)   | 817.2   |
| 35-39  | 717(6.5%)   | 723(6.4%)   | 718(6.3%)   | 718(6.2%)   | 731(6.2%)   | 721.4   |
| 40-44  | 601(5.5%)   | 612(5.5%)   | 636(5.6%)   | 660(5.7%)   | 666(5.6%)   | 635     |
| 45-49  | 603(5.5%)   | 617(5.5%)   | 621(5.4%)   | 615(5.3%)   | 592(5%)     | 609.6   |
| 50-54  | 437(4%)     | 469(4.2%)   | 493(4.3%)   | 526(4.5%)   | 557(4.7%)   | 496.4   |
| 55-59  | 318(2.9%)   | 342(3.1%)   | 355(3.1%)   | 391(3.4%)   | 405(3.4%)   | 362.2   |
| 60-64  | 233(2.1%)   | 237(2.1%)   | 249(2.2%)   | 261(2.2%)   | 287(2.4%)   | 253.4   |
| 65+    | 536(4.9%)   | 552(4.9%)   | 571(5%)     | 592(5.1%)   | 614(5.2%)   | 573     |
| Total  | 10984(100%) | 11213(100%) | 11434(100%) | 11642(100%) | 11866(100%) | 11427.8 |
| Female |             |             |             |             |             |         |
| 0-4    | 944(9%)     | 926(8.6%)   | 921(8.4%)   | 895(8%)     | 859(7.5%)   | 909.0   |
| 5-9    | 1240(11.8%) | 1272(11.8%) | 1309(11.9%) | 1325(11.8%) | 1351(11.9%) | 1299.4  |
| 10-14  | 1138(10.8%) | 1178(11%)   | 1205(11%)   | 1208(10.8%) | 1220(10.7%) | 1189.8  |
| 15-19  | 1120(10.7%) | 1099(10.2%) | 1093(10%)   | 1123(10%)   | 1150(10.1%) | 1117.0  |
| 20-24  | 1075(10.2%) | 1125(10.5%) | 1134(10.3%) | 1151(10.3%) | 1129(9.9%)  | 1122.8  |
| 25-29  | 861(8.2%)   | 879(8.2%)   | 916(8.3%)   | 954(8.5%)   | 1032(9.1%)  | 928.4   |
| 30-34  | 801(7.6%)   | 795(7.4%)   | 814(7.4%)   | 826(7.4%)   | 823(7.2%)   | 811.8   |
| 35-39  | 655(6.2%)   | 695(6.5%)   | 704(6.4%)   | 729(6.5%)   | 765(6.7%)   | 709.6   |
| 40-44  | 638(6.1%)   | 628(5.8%)   | 636(5.8%)   | 631(5.6%)   | 646(5.7%)   | 635.8   |
| 45-49  | 558(5.3%)   | 582(5.4%)   | 589(5.4%)   | 609(5.4%)   | 602(5.3%)   | 588.0   |
| 50-54  | 412(3.9%)   | 445(4.1%)   | 481(4.4%)   | 504(4.5%)   | 523(4.6%)   | 473.0   |
| 55-59  | 269(2.6%)   | 305(2.8%)   | 336(3.1%)   | 362(3.2%)   | 384(3.4%)   | 331.2   |
| 60-64  | 218(2.1%)   | 218(2%)     | 232(2.1%)   | 234(2.1%)   | 251(2.2%)   | 230.6   |
| 65+    | 575(5.5%)   | 597(5.6%)   | 610(5.6%)   | 636(5.7%)   | 656(5.8%)   | 614.8   |
| Total  | 10504(100%) | 10744(100%) | 10980(100%) | 11187(100%) | 11391(100%) | 10961.2 |

\*Number of people on reserve (Percentage in a given year)

**Supplemental Table S2. Demographics of medical transports by year, sex, and age group**

|                | 2012        | 2013       | 2014       | 2015       | 2016       | Mean  |
|----------------|-------------|------------|------------|------------|------------|-------|
| Total          | 2051        | 2141       | 2169       | 2032       | 2145       |       |
| <b>Male</b>    |             |            |            |            |            |       |
| 0-4            | *176(19.8%) | 140(14.8%) | 190(20%)   | 136(15.1%) | 182(18.9%) | 164.8 |
| 5-9            | 38(4.3%)    | 36(3.8%)   | 32(3.4%)   | 43(4.8%)   | 30(3.1%)   | 35.8  |
| 10-14          | 47(5.3%)    | 39(4.1%)   | 43(4.5%)   | 36(4%)     | 58(6%)     | 44.6  |
| 15-19          | 85(9.6%)    | 51(5.4%)   | 52(5.5%)   | 46(5.1%)   | 58(6%)     | 58.4  |
| 20-24          | 73(8.2%)    | 87(9.2%)   | 67(7.1%)   | 77(8.5%)   | 66(6.9%)   | 74.0  |
| 25-29          | 64(7.2%)    | 74(7.8%)   | 67(7.1%)   | 53(5.9%)   | 62(6.4%)   | 64.0  |
| 30-34          | 54(6.1%)    | 52(5.5%)   | 51(5.4%)   | 46(5.1%)   | 50(5.2%)   | 50.6  |
| 35-39          | 47(5.3%)    | 63(6.7%)   | 38(4%)     | 55(6.1%)   | 51(5.3%)   | 50.8  |
| 40-44          | 56(6.3%)    | 57(6%)     | 52(5.5%)   | 39(4.3%)   | 44(4.6%)   | 49.6  |
| 45-49          | 45(5.1%)    | 59(6.2%)   | 76(8%)     | 72(8%)     | 57(5.9%)   | 61.8  |
| 50-54          | 37(4.2%)    | 44(4.7%)   | 50(5.3%)   | 66(7.3%)   | 66(6.9%)   | 52.6  |
| 55-59          | 29(3.3%)    | 38(4%)     | 40(4.2%)   | 56(6.2%)   | 61(6.3%)   | 44.8  |
| 60-64          | 32(3.6%)    | 36(3.8%)   | 42(4.4%)   | 26(2.9%)   | 46(4.8%)   | 36.4  |
| 65+            | 104(11.7%)  | 169(17.9%) | 147(15.5%) | 152(16.8%) | 132(13.7%) | 140.8 |
| Unknown        | 2(0.2%)     | 1(0.1%)    | 2(0.2%)    | 0(0%)      | 0(0%)      | 1.0   |
| Total          | 889         | 946        | 949        | 903        | 963        |       |
| <b>Female</b>  |             |            |            |            |            |       |
| 0-4            | 101(8.8%)   | 136(11.5%) | 127(10.5%) | 104(9.3%)  | 129(11%)   | 119.4 |
| 5-9            | 26(2.3%)    | 34(2.9%)   | 32(2.6%)   | 21(1.9%)   | 21(1.8%)   | 26.8  |
| 10-14          | 54(4.7%)    | 43(3.6%)   | 69(5.7%)   | 90(8%)     | 107(9.1%)  | 72.6  |
| 15-19          | 168(14.7%)  | 118(10%)   | 93(7.7%)   | 110(9.8%)  | 143(12.2%) | 126.4 |
| 20-24          | 131(11.5%)  | 155(13.1%) | 154(12.7%) | 136(12.2%) | 128(10.9%) | 140.8 |
| 25-29          | 111(9.7%)   | 104(8.8%)  | 92(7.6%)   | 104(9.3%)  | 101(8.6%)  | 102.4 |
| 30-34          | 96(8.4%)    | 108(9.1%)  | 96(7.9%)   | 74(6.6%)   | 98(8.4%)   | 94.4  |
| 35-39          | 48(4.2%)    | 59(5%)     | 60(5%)     | 58(5.2%)   | 60(5.1%)   | 57    |
| 40-44          | 48(4.2%)    | 55(4.6%)   | 57(4.7%)   | 52(4.6%)   | 45(3.8%)   | 51.4  |
| 45-49          | 56(4.9%)    | 56(4.7%)   | 59(4.9%)   | 66(5.9%)   | 63(5.4%)   | 60    |
| 50-54          | 58(5.1%)    | 56(4.7%)   | 80(6.6%)   | 59(5.3%)   | 49(4.2%)   | 60.4  |
| 55-59          | 45(3.9%)    | 55(4.6%)   | 53(4.4%)   | 41(3.7%)   | 49(4.2%)   | 48.6  |
| 60-64          | 61(5.3%)    | 45(3.8%)   | 52(4.3%)   | 26(2.3%)   | 32(2.7%)   | 43.2  |
| 65+            | 136(11.9%)  | 154(13%)   | 182(15.1%) | 176(15.7%) | 147(12.5%) | 159   |
| Unknown        | 5(0.4%)     | 6(0.5%)    | 2(0.2%)    | 2(0.2%)    | 0(0%)      | 3     |
| Total          | 1144        | 1184       | 1208       | 1119       | 1172       |       |
| <b>Unknown</b> |             |            |            |            |            |       |
| Sex            | 18          | 11         | 12         | 10         | 10         |       |

\*Number of transports(Percentage in a given year)

**Supplemental Table S3. Number of transports over the study period for selected groups of patients**

|                                               | Total transports over study period |
|-----------------------------------------------|------------------------------------|
| Transfer of children 28 days to 1 year        | 643                                |
| Transfer of children under the age of 28 days | 133                                |
| Transfer of adults 75-84                      | 642                                |
| Transfer of adults 85+                        | 162                                |

Supplemental Table S4. Incidence of medical transport by year, sex, and age group

|        | 2012 | 2013 | 2014 | 2015 | 2016 | Mean |
|--------|------|------|------|------|------|------|
| Male   |      |      |      |      |      |      |
| 0-4    | 17.2 | 13.8 | 19.1 | 14.6 | 19.8 | 16.9 |
| 05-09  | 3.0  | 2.8  | 2.4  | 3.1  | 2.1  | 2.7  |
| 10-14  | 3.8  | 3.1  | 3.4  | 2.8  | 4.3  | 3.5  |
| 15-19  | 7.0  | 4.2  | 4.3  | 3.8  | 4.8  | 4.9  |
| 20-24  | 6.5  | 7.6  | 5.8  | 6.7  | 5.6  | 6.4  |
| 25-29  | 7.0  | 7.6  | 6.7  | 5.0  | 5.6  | 6.4  |
| 30-34  | 7.0  | 6.7  | 6.2  | 5.4  | 5.7  | 6.2  |
| 35-39  | 6.6  | 8.7  | 5.3  | 7.7  | 7.0  | 7.0  |
| 40-44  | 9.3  | 9.3  | 8.2  | 5.9  | 6.6  | 7.9  |
| 45-49  | 7.5  | 9.6  | 12.2 | 11.7 | 9.6  | 10.1 |
| 50-54  | 8.5  | 9.4  | 10.1 | 12.5 | 11.8 | 10.5 |
| 55-59  | 9.1  | 11.1 | 11.3 | 14.3 | 15.1 | 12.2 |
| 60-64  | 13.7 | 15.2 | 16.9 | 10.0 | 16.0 | 14.4 |
| 65+    | 19.4 | 30.6 | 25.7 | 25.7 | 21.5 | 24.6 |
| Female |      |      |      |      |      |      |
| 0-4    | 10.7 | 14.7 | 13.8 | 11.6 | 15.0 | 13.2 |
| 05-09  | 2.1  | 2.7  | 2.4  | 1.6  | 1.6  | 2.1  |
| 10-14  | 4.7  | 3.7  | 5.7  | 7.5  | 8.8  | 6.1  |
| 15-19  | 15.0 | 10.7 | 8.5  | 9.8  | 12.4 | 11.3 |
| 20-24  | 12.2 | 13.8 | 13.6 | 11.8 | 11.3 | 12.5 |
| 25-29  | 12.9 | 11.8 | 10.0 | 10.9 | 9.8  | 11.1 |
| 30-34  | 12.0 | 13.6 | 11.8 | 9.0  | 11.9 | 11.6 |
| 35-39  | 7.3  | 8.5  | 8.5  | 8.0  | 7.8  | 8.0  |
| 40-44  | 7.5  | 8.8  | 9.0  | 8.2  | 7.0  | 8.1  |
| 45-49  | 10.0 | 9.6  | 10.0 | 10.8 | 10.5 | 10.2 |
| 50-54  | 14.1 | 12.6 | 16.6 | 11.7 | 9.4  | 12.9 |
| 55-59  | 16.7 | 18.0 | 15.8 | 11.3 | 12.8 | 14.9 |
| 60-64  | 28.0 | 20.6 | 22.4 | 11.1 | 12.7 | 19.0 |
| 65+    | 23.7 | 25.8 | 29.8 | 27.7 | 22.4 | 25.9 |

**Supplemental Table S5. Transports by accepting facility with greater than 50 transports**

| Community                                                 | 2012        | 2013        | 2014        | 2015        | 2016        | Mean   |
|-----------------------------------------------------------|-------------|-------------|-------------|-------------|-------------|--------|
| Kingston - Kingston General Hospital                      | 38(1.9%)    | 57(2.7%)    | 33(1.5%)    | 33(1.6%)    | 50(2.3%)    | 42.2   |
| Moose Factory - Weeneebayko General Hospital              | 359(17.5%)  | 281(13.1%)  | 344(15.9%)  | 355(17.5%)  | 321(15%)    | 332    |
| Out of Province - Manitoba                                | 81(3.9%)    | 41(1.9%)    | 57(2.6%)    | 55(2.7%)    | 56(2.6%)    | 58     |
| Sioux Lookout - Meno Ya Win Health Centre                 | 1117(54.5%) | 1291(60.3%) | 1176(54.2%) | 1024(50.4%) | 1120(52.2%) | 1145.6 |
| Thunder Bay - Thunder Bay Regional Health Sciences Centre | 271(13.2%)  | 239(11.2%)  | 272(12.5%)  | 288(14.2%)  | 291(13.6%)  | 272.2  |
| Timmins - Timmins and District Hospital                   | 35(1.7%)    | 78(3.6%)    | 67(3.1%)    | 66(3.2%)    | 68(3.2%)    | 62.8   |
| Winnipeg - Children's Hospital                            | 54(2.6%)    | 43(2%)      | 91(4.2%)    | 87(4.3%)    | 117(5.5%)   | 78.4   |
| Winnipeg - Health Sciences Centre                         | 38(1.9%)    | 26(1.2%)    | 49(2.3%)    | 58(2.9%)    | 44(2.1%)    | 43     |
| Winnipeg - St. Boniface Hospital                          | 9(0.4%)     | 5(0.2%)     | 12(0.6%)    | 18(0.9%)    | 17(0.8%)    | 12.2   |
| Total                                                     | 2002        | 2061        | 2101        | 1984        | 2084        |        |

\*Number of transports(Percentage in a given year)
